# Supplementary material for: Screening of Yeasts Isolated from Baijiu Environments for Producing 3-Methylthio-1-propanol and Optimizing Production Conditions
Source: MDPI journal article supplement (doi:10.3390/foods11223616), 2022-11-12
Supplement: s1 [file s1]

## **Supplementary material for**

Screening of yeasts isolated from *Baijiu* environments for producing  
3-methylthiopropanol and optimizing production conditions

**Supplementary Table S1.** Factors and levels of single factor design and their optimization conditions.

| <b>Factor</b>                     | <b>Level/type</b>                                                                        | <b>Optimization condition</b>       |
|-----------------------------------|------------------------------------------------------------------------------------------|-------------------------------------|
| Glucose concentration (g/L)       | 10, 20, 30, 40, 50, 60 and 70                                                            | <b>30-60</b>                        |
| Yeast extract concentration (g/L) | 0, 0.4, 0.8, 1.2, 1.6, 2.0, 2.4 and 2.8                                                  | <b>2-2.8</b>                        |
| L-Met concentration (g/L)         | 0, 2, 4, 6, 8, 10, 12 and 14                                                             | <b>4</b>                            |
| Time point of L-Met addition (h)  | 0, 12, 24, 36, 48, 60 and 72                                                             | <b>24</b>                           |
| Initial pH                        | 3.0, 3.5, 4.0, 4.5, 5.0, 5.5, 6.0, 6.5 and 7.0                                           | <b>4.0-5.5</b>                      |
| Temperature (°C)                  | 20, 24, 28, 32, 36 and 40                                                                | <b>32</b>                           |
| Shaking speed (rpm)               | 0, 45, 90, 135, 180, 225 and 270                                                         | <b>135</b>                          |
| Loading volume (mL/250 mL)        | 25, 50, 75, 100 and 125                                                                  | <b>75</b>                           |
| Inoculum size (% v/v)             | 0.1, 0.2, 0.4, 0.8, 1.6, 3.2 and 6.4                                                     | <b>0.2-3.2</b>                      |
| Surfactant types                  | Control, glycerol, Tween-20, Tween-40, Tween-60, Tween-80, Triton X-100 and Triton X-114 | <b>Tween-20-80 and Triton X-100</b> |
| Tween-80 concentration (g/L)      | 0, 2, 4, 8, 16, 32 and 64                                                                | <b>2-64</b>                         |
| Time (h)                          | 0, 12, 24, 36, 48, 60, 72, 84 and 96                                                     | <b>48-96</b>                        |

**Supplementary Table S2.** Physiological and biochemical characteristics of strain YHM-G.

| Tests                              | Results                 |                           |
|------------------------------------|-------------------------|---------------------------|
|                                    | Sugars                  | Characteristics of YHM-G  |
| Sugar fermentation tests           | Glucose                 | Acid and gas production   |
|                                    | Maltose                 |                           |
|                                    | D-Galactose             |                           |
|                                    | Sucrose                 | Acid production, no gas   |
|                                    | D-Maltose               |                           |
|                                    | D-Xylose                | Gas production, no acid   |
|                                    | L-rhamnose monohydrate  | No acid, no gas, but grow |
|                                    | D-Arabinose             |                           |
|                                    | Lactose                 |                           |
| Carbon source assimilation tests   | Carbon sources          | Characteristics of YHM-G  |
|                                    | Ethanol                 | +                         |
|                                    | Glycerol                |                           |
|                                    | Inulin                  |                           |
|                                    | D-Raffinose             | —                         |
|                                    | D-Trehalose             |                           |
|                                    | Mannose                 |                           |
|                                    | D-Ribose                |                           |
|                                    | D-Sorbose               |                           |
| Nitrogen source assimilation tests | Nitrogen sources        | Characteristics of YHM-G  |
|                                    | Urea                    | +                         |
|                                    | Ammonium sulfate        |                           |
|                                    | Sodium nitrite          |                           |
|                                    | Potassium nitrate       |                           |
|                                    | L-Phenylalanine         |                           |
|                                    | L-Lysine                | +                         |
| Other tests                        | Indole test             |                           |
|                                    | Methyl red test         |                           |
|                                    | Starch hydrolysis test  |                           |
|                                    | Citrate test            |                           |
|                                    | Urea test               |                           |
|                                    | Voges-Proskauer test    |                           |
|                                    | Hydrogen sulfide test   | —                         |
|                                    | Gelatin liquidized test |                           |

Note: “+”, positive response; “—”, negative response.

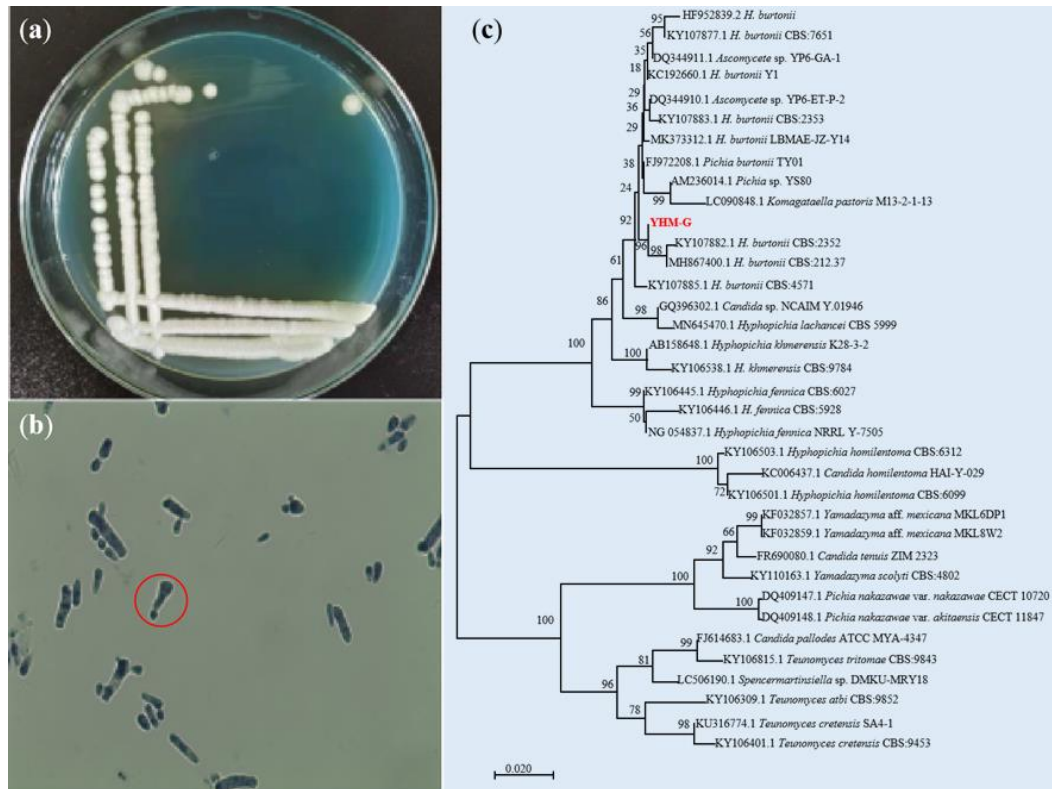

**Supplementary Figure S1.** Colony morphology on WL medium (a), cell morphology (10 × 100 times magnification) (b) and neighbor-joining phylogenetic tree based on ribosomal large subunit 26S rRNA gene (D1/D2 region) gene sequence and closest relative species (c) of strain YHM-G. Cell was stained by the methylene blue method. The asexual budding reproduction occurred at the ends of the cells was highlighted in the red circle.

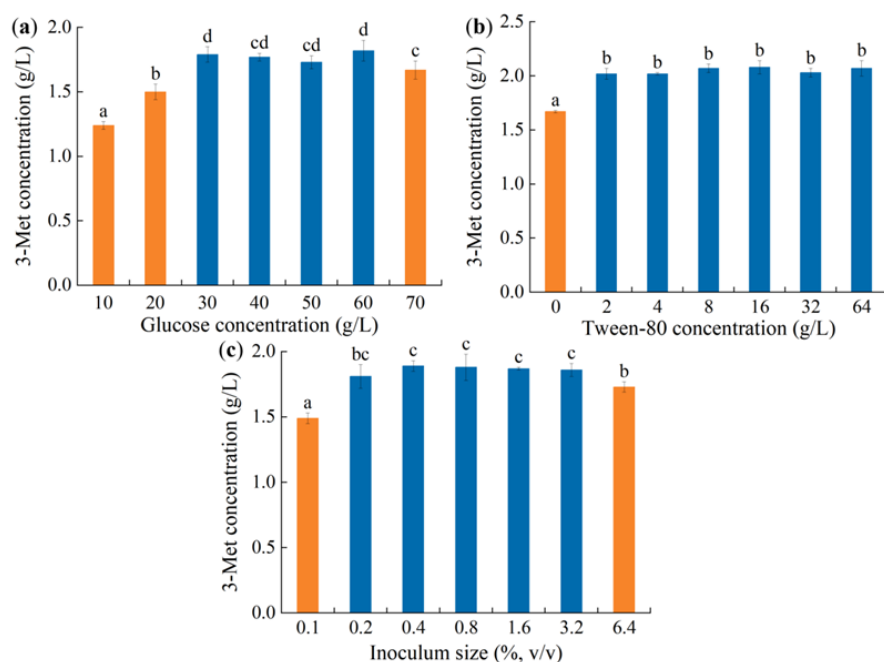

**Supplementary Figure S2.** Effect of glucose concentration (10, 20, 30, 40, 50, 60 and 70 g/L) (a), T-ween-80 concentration (0, 2, 4, 8, 16, 32 and 64 g/L) (b), inoculum size (0.1, 0.2, 0.4, 0.8, 1.6, 3.2 and 6.4%, v/v) on 3-Met concentration. Same letters in the column indicates that the data do not differ significantly at 5% probability by the Tukey test.

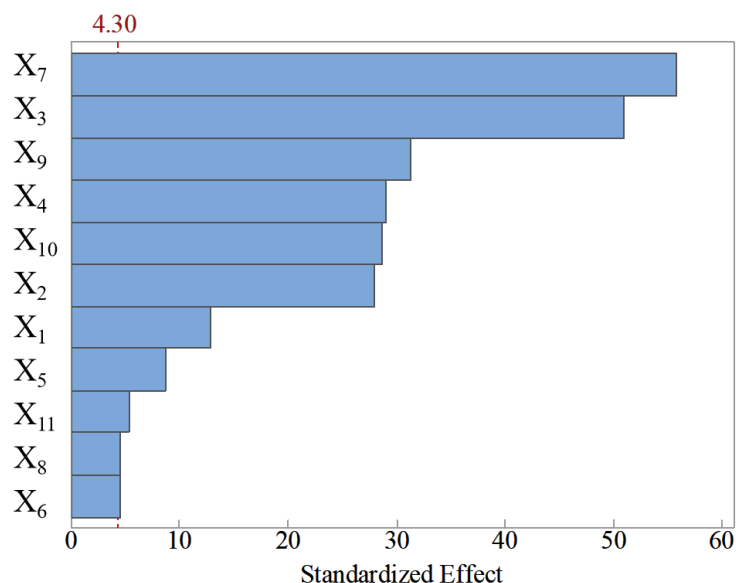

**Supplementary Figure S3.** Standardized Pareto chart showing the effect of variables on 3-Met concentration. X1, shaking speed; X2, temperature; X3, glucose concentration; X4, initial pH; X5, loading volume; X6, inoculum size; X7, time point of L-Met addition; X8, culture time; X9, yeast extract concentration; X10, L-Met concentration; X11, Tween-80 concentration.
